# Supplementary material for: Disease burden and attributable risk factors of respiratory infections in China from 1990 to 2019
Source: PubMed Central journal article supplement — Lancet Reg Health West Pac. 2021 Apr 27;11:100153. doi: 10.1016/j.lanwpc.2021.100153 (PMC8315661; doi:10.1016/j.lanwpc.2021.100153), 2021-04-27
Supplement: mmc1.pdf [file mmc1.pdf]

# Disease burden and attributable risk factors of respiratory infections in China from 1990 to 2019

Zengliang Ruan<sup>a,#</sup>, Jinlei Qi<sup>b,#</sup>, Zhengmin (Min) Qian<sup>c</sup>, Maigeng Zhou<sup>b</sup>, Yin Yang<sup>a</sup>,  
Shiyu Zhang<sup>a</sup>, Michael G. Vaughn<sup>d</sup>, Morgan H. LeBaige<sup>c</sup>, Peng Yin<sup>b,\*</sup>, Hualiang Lin<sup>a,\*</sup>

## Supporting information legends

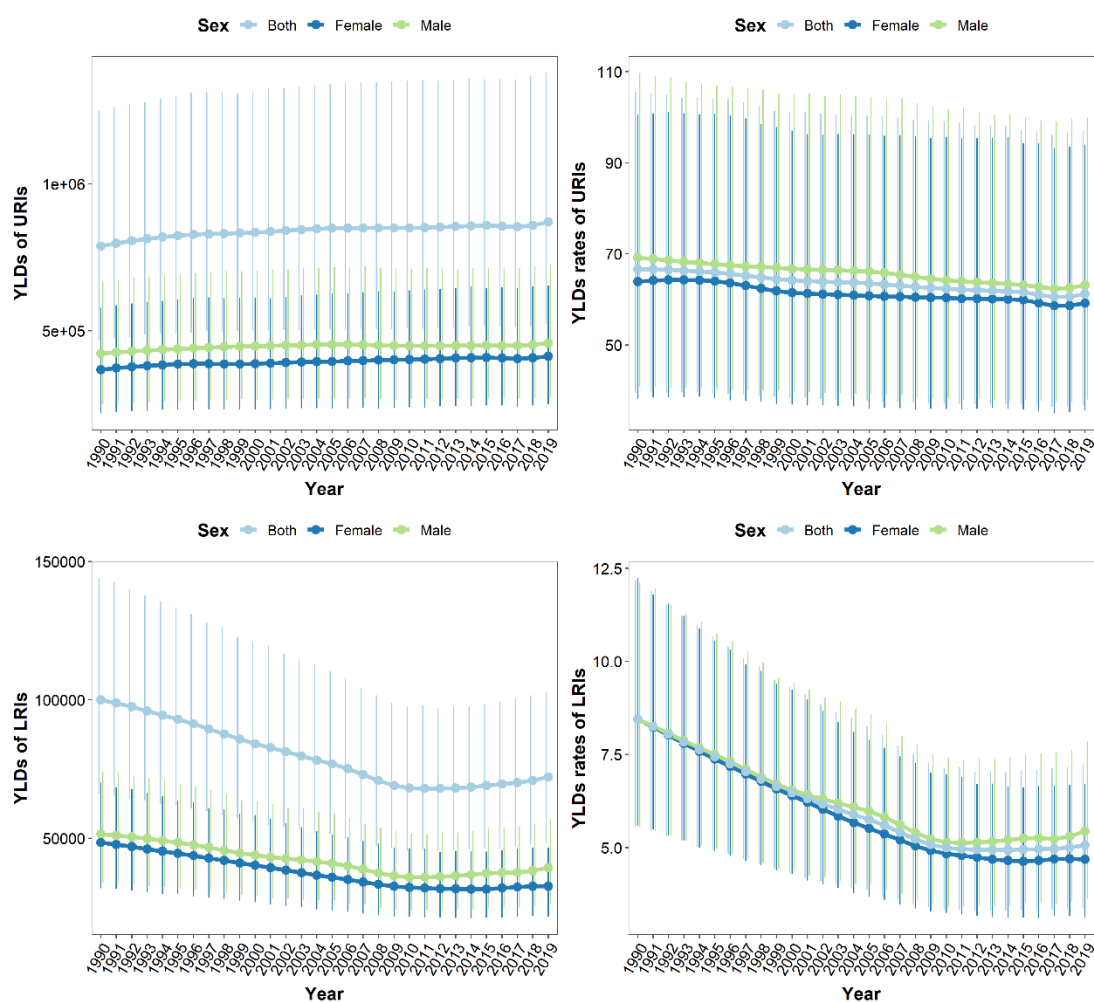

Supplementary fig 1. Trends of years lived with disability of upper and lower respiratory infections in China from 1990 to 2019.

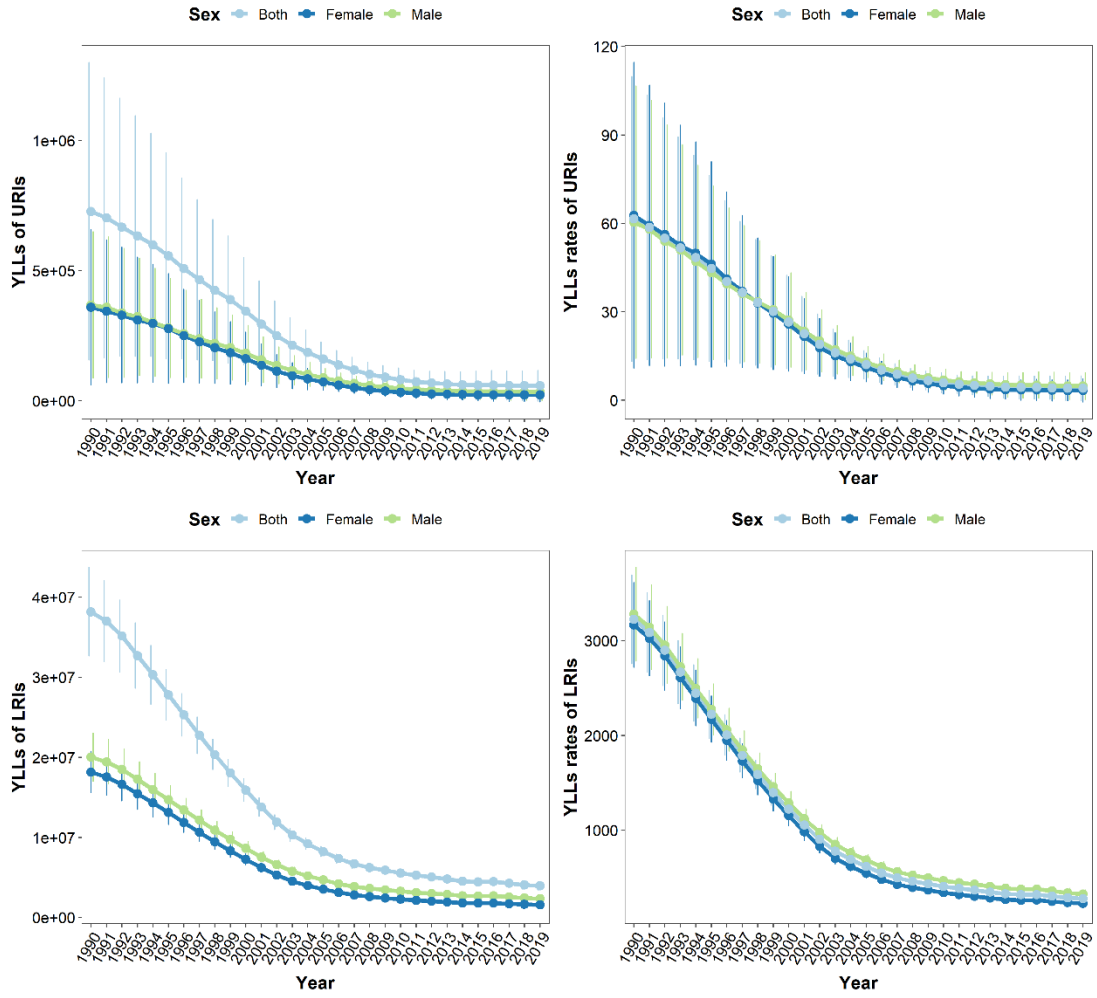

**Supplementary fig 2. Trends of years of life lost due to upper and lower respiratory infections in China from 1990 to 2019.**

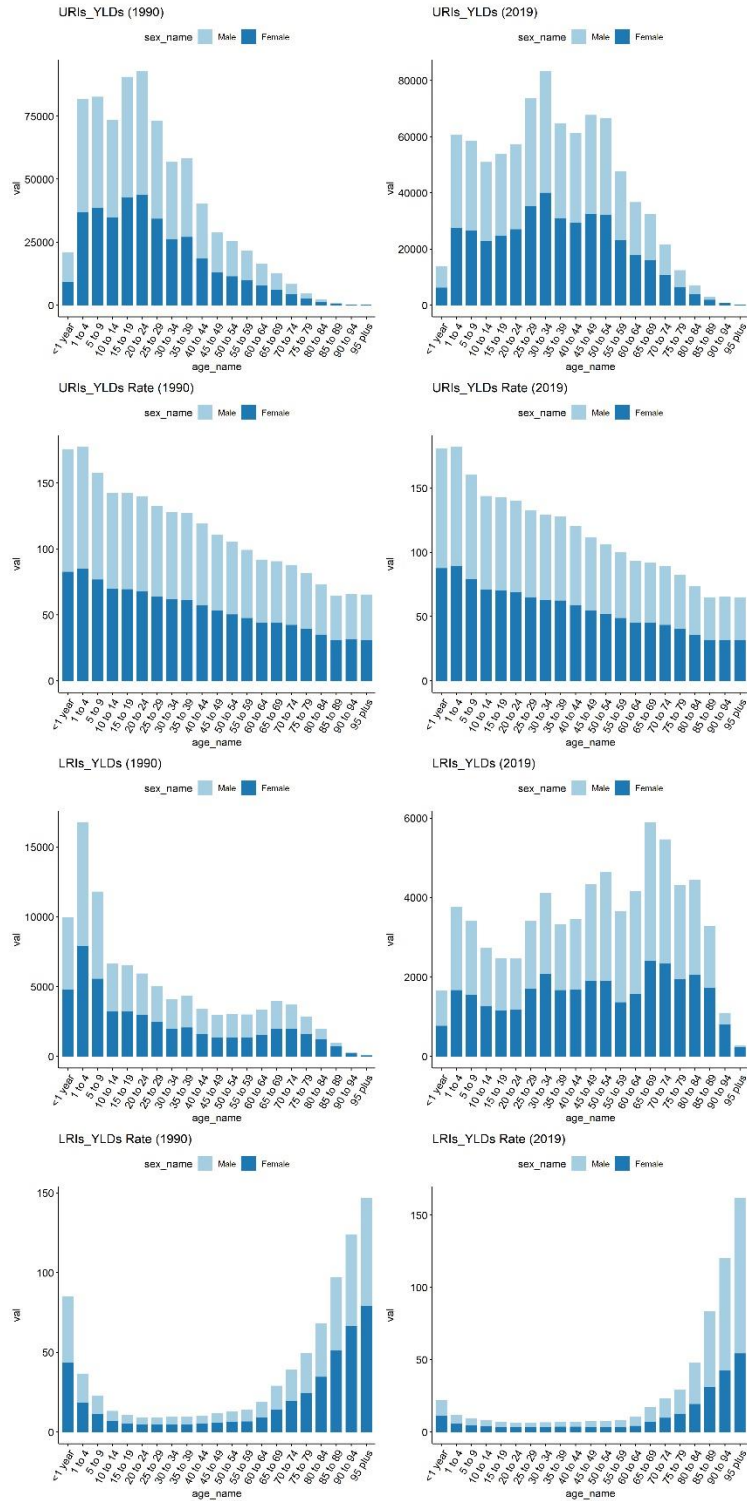

**Supplementary fig 3. The age-specific years lived with disability of upper and lower respiratory infections in 1990 and 2019.**

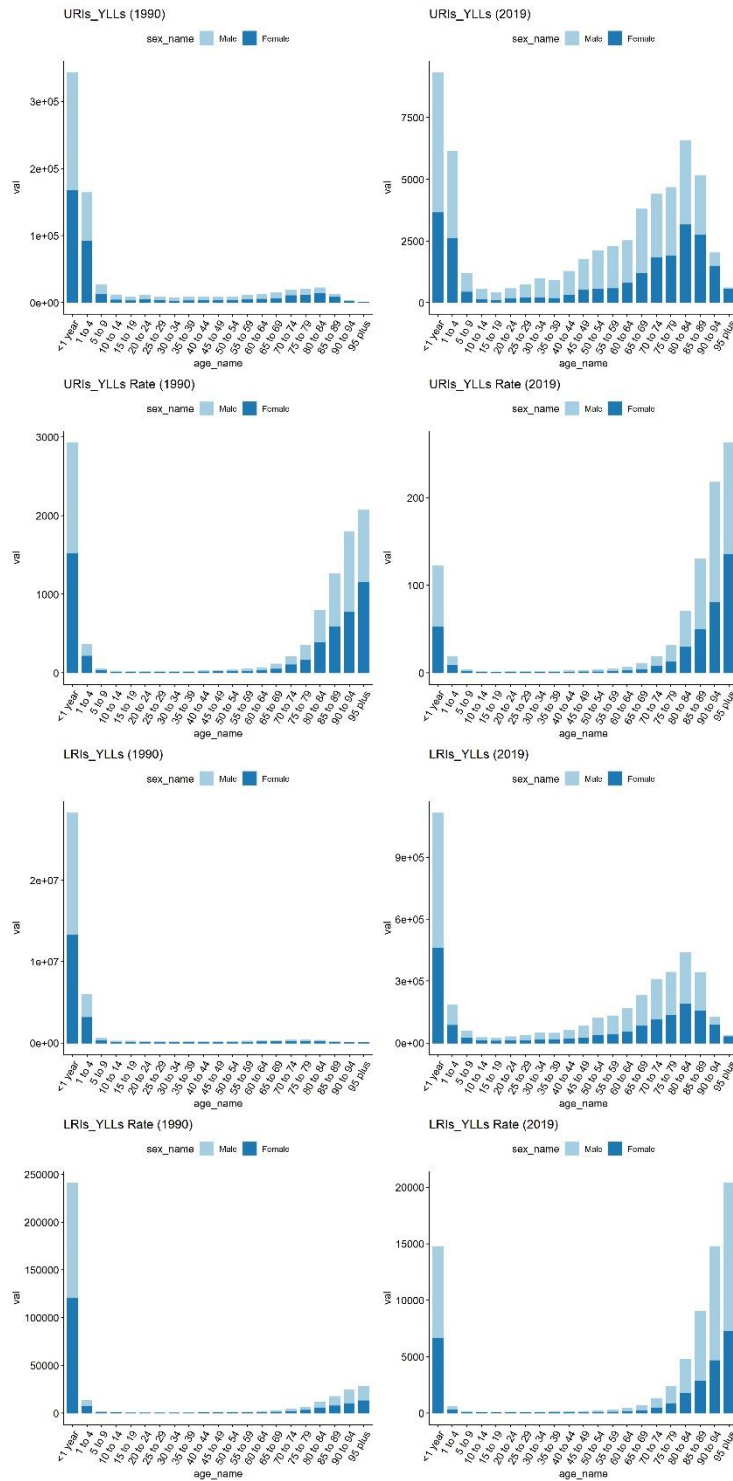

Supplementary fig 4. The age-specific years of life lost due to upper and lower respiratory infections in 1990 and 2019.

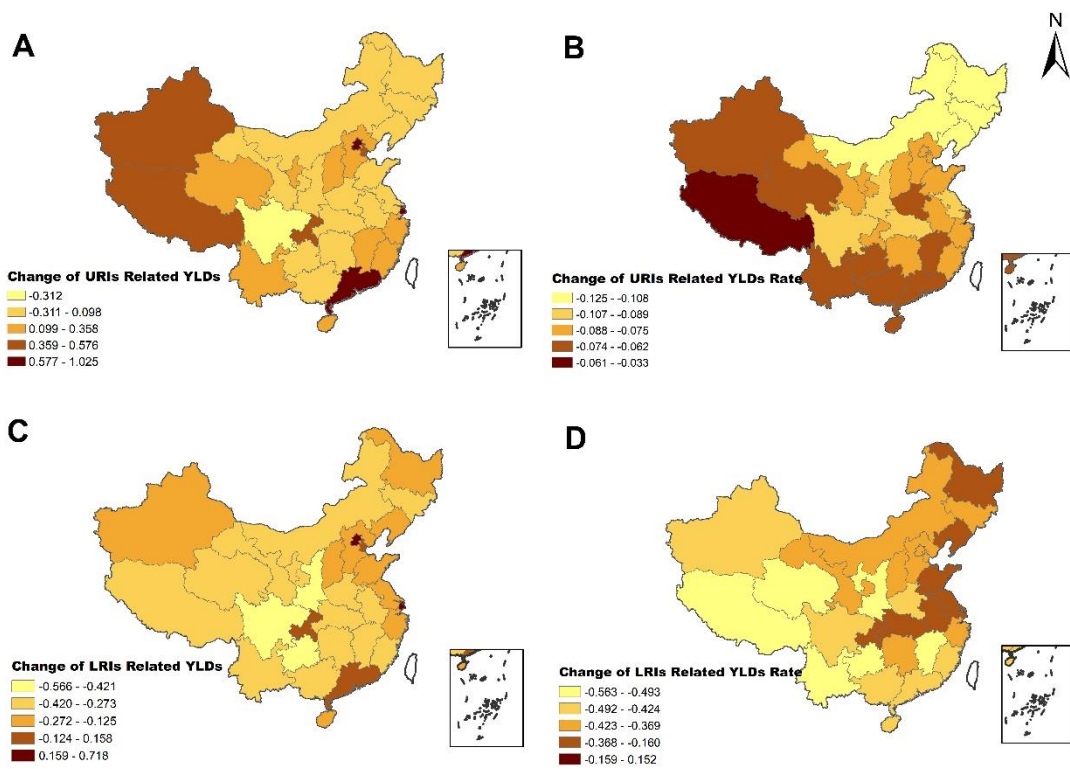

**Supplementary fig 5. The change of province-specific years lived with disability of upper and lower respiratory infections from 1990 to 2019.**

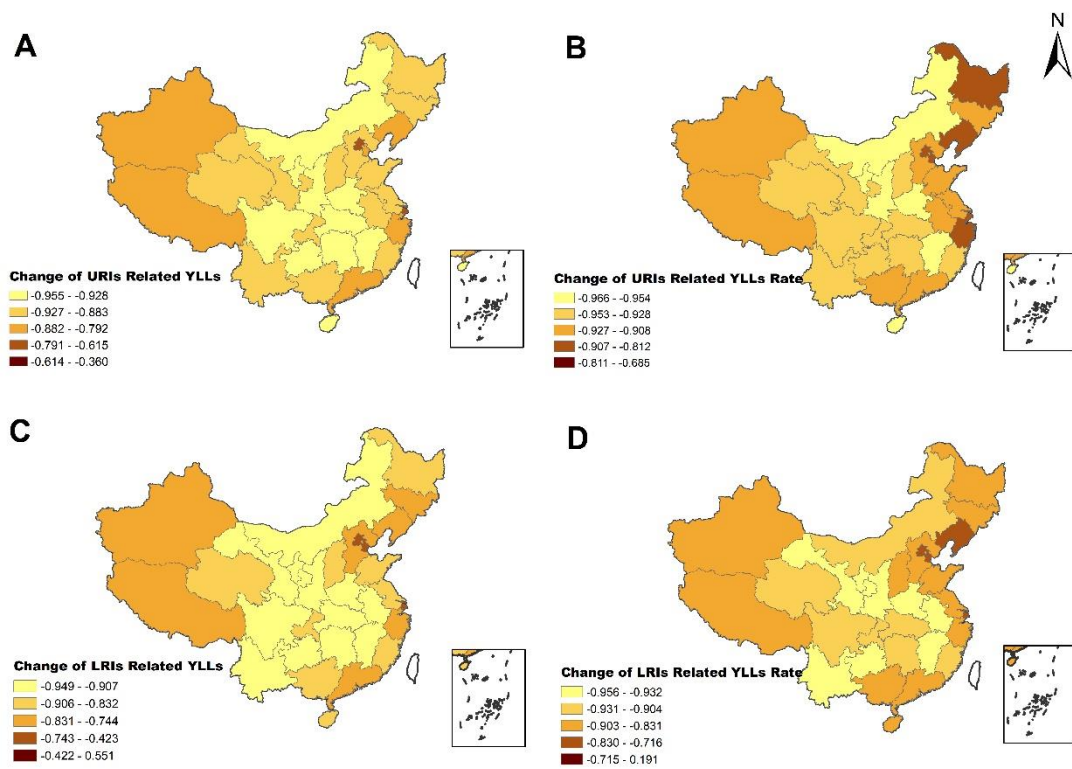

**Supplementary fig 6. The change of province-specific years of life lost due to upper and lower respiratory infections from 1990 to 2019.**

**Supplementary table 1. All-age years lived with disability (YLDs) of upper and lower respiratory infections and their percentage change by sex in China, 1990–2019.**

| Subcategories                | All-age YLDs (95% UI), No. in thousands |                                |                            | Age-standardized YLD rate (95% UI), per 100,000 |                            |                            |
|------------------------------|-----------------------------------------|--------------------------------|----------------------------|-------------------------------------------------|----------------------------|----------------------------|
|                              | 1990                                    | 2019                           | Change (%)                 | 1990                                            | 2019                       | Change (%)                 |
| Upper respiratory infections |                                         |                                |                            |                                                 |                            |                            |
| Male                         | 422·12<br>(249·53–<br>669·10)           | 457·96<br>(276·33–<br>723·23)  | 8·49 (2·31–<br>14·72)      | 69·18<br>(40·89–<br>109·66)                     | 63·18<br>(38·12–<br>99·78) | -8·67 (-13·87–<br>-3·42)   |
| Female                       | 366·63<br>(219·67–<br>576·61)           | 412·81<br>(249·32–<br>654·69)  | 12·60 (5·58–<br>19·50)     | 63·93<br>(38·30–<br>100·54)                     | 59·18<br>(35·74–<br>93·86) | -7·43 (-13·20–<br>-1·75)   |
| Total                        | 788·74<br>(467·93–<br>1248·80)          | 870·77<br>(525·68–<br>1377·52) | 10·40 (3·87–<br>16·77)     | 66·63<br>(39·53–<br>105·50)                     | 61·22<br>(36·96–<br>96·85) | -8·13 (-13·56–<br>-2·82)   |
| Lower respiratory infections |                                         |                                |                            |                                                 |                            |                            |
| Male                         | 51·52<br>(33·93–<br>73·94)              | 39·44<br>(26·44–<br>56·80)     | -23·44 (-28·67–<br>-18·51) | 8·44 (5·56–<br>12·12)                           | 5·44 (3·65–<br>7·84)       | -35·55 (-39·95–<br>-31·40) |
| Female                       | 48·46<br>(32·20–<br>70·15)              | 32·70<br>(21·84–<br>46·74)     | -32·51 (-36·96–<br>-27·38) | 8·45 (5·62–<br>12·23)                           | 4·69 (3·13–<br>6·70)       | -44·51 (-48·17–<br>-40·30) |
| Total                        | 99·97<br>(66·18–<br>143·98)             | 72·15<br>(48·41–<br>102·66)    | -27·83 (-32·11–<br>-23·48) | 8·45 (5·59–<br>12·16)                           | 5·07 (3·40–<br>7·22)       | -39·94 (-43·50–<br>-36·32) |

**Supplementary table 2. All-age years of life lost (YLLs) of upper and lower respiratory infections and their percentage change by sex in China, 1990–2019.**

| Subcategories                | All-age YLLs (95% UI), No. in thousands |                           |                       | Age-standardized YLL rate (95% UI), per 100,000 |                        |                        |
|------------------------------|-----------------------------------------|---------------------------|-----------------------|-------------------------------------------------|------------------------|------------------------|
|                              | 1990                                    | 2019                      | Change (%)            | 1990                                            | 2019                   | Change (%)             |
| Upper respiratory infections |                                         |                           |                       |                                                 |                        |                        |
| Male                         | 368.28 (85.82–650.74)                   | 34.76 (0.55–68.96)        | -90.56 (-96.52–22.99) | 60.36 (14.07–106.65)                            | 4.80 (0.08–9.51)       | -92.06 (-97.07–3.54)   |
| Female                       | 359.70 (61.75–657.65)                   | 23.09 (-4.03–50.21)       | -93.58 (-98–31.04)    | 62.72 (10.77–114.67)                            | 3.31 (-0.58–7.20)      | -94.72 (-98.36–7.74)   |
| Total                        | 727.98 (155.02–1300.94)                 | 57.85 (-1.62–117.31)      | -92.05 (-97.18–25.34) | 61.50 (13.10–109.91)                            | 4.07 (-0.11–8.25)      | -93.39 (-97.66–4.31)   |
| Lower respiratory infections |                                         |                           |                       |                                                 |                        |                        |
| Male                         | 20017.58 (16995.46–23039.70)            | 2364.94 (2021.14–2708.74) | -88.19 (-90.45–84.24) | 3280.57 (2785.29–3775.84)                       | 326.28 (278.85–373.71) | -90.05 (-91.96–-86.74) |
| Female                       | 18160.95 (15588.76–20733.14)            | 1583.59 (1320.97–1846.21) | -91.28 (-92.98–88.53) | 3166.71 (2718.20–3615.23)                       | 227.03 (189.38–264.68) | -92.83 (-94.23–-90.57) |
| Total                        | 38178.53 (32615.84–43741.22)            | 3948.53 (3431.80–4465.26) | -89.66 (-91.46–86.59) | 3225.40 (2755.46–3695.35)                       | 277.61 (241.28–313.94) | -91.39 (-92.89–-88.84) |
